# Supplementary material
Source: ML conference proceedings conference paper supplement (https://proceedings.mlr.press/v54/nitanda17a.html)
Supplement: Supplementary file 1 [file nitanda17a-supp.pdf]

## A Proofs

We give proofs of convergence analyses. We first prove the Proposition 1.

*Proof of Proposition 1.* Since  $\phi_k$  is  $(L_g + \mu_k)$ -smooth function, we have

$$\phi_k(x) \leq \phi_k(x_k) + \langle \nabla \phi_k(x_k), x - x_k \rangle + \frac{L_g + \mu_k}{2} \|x - x_k\|_2^2.$$

By minimizing both sides of the above inequality,

$$\phi_k^* \leq \phi_k(x_k) - \frac{1}{2(L_g + \mu_k)} \|\nabla \phi_k(x_k)\|_2^2.$$

Noting that  $\phi_k(x_k) = f(x_k)$  and  $\mathbb{E}_{v_h(x_k)}[\|\nabla \phi_k(x_k)\|_2^2 | \mathcal{F}_k] \geq \|\nabla f(x_k)\|_2^2$ , we have

$$\mathbb{E}_{v_h(x_k)}[\phi_k^* | \mathcal{F}_k] \leq f(x_k) - \frac{1}{2(L_g + \mu_k)} \|\nabla f(x_k)\|_2^2.$$

Using  $\mathbb{E}[\phi_k(x_{k+1}) | \mathcal{F}_k] \leq \phi_k^* + \delta$  and the above inequality, we have

$$\mathbb{E}[\phi_k(x_{k+1}) | \mathcal{F}_k] \leq \delta + f(x_k) - \frac{1}{2(L_g + \mu_k)} \|\nabla f(x_k)\|_2^2.$$

Thus, it follows that

$$\begin{aligned} & \mathbb{E}[f(x_{k+1}) + \frac{\mu_k}{2} \|x_{k+1} - x_k\|_2^2 | \mathcal{F}_k] \\ & \leq \mathbb{E}[g(x_{k+1}) - (h(x_k) + \langle \nabla h(x_k), x_{k+1} - x_k \rangle) + \frac{\mu_k}{2} \|x_{k+1} - x_k\|_2^2 | \mathcal{F}_k] \\ & = \mathbb{E}[\phi_k(x_{k+1}) - \langle \nabla h(x_k) - v_h(x_k), x_{k+1} - x_k \rangle | \mathcal{F}_k] \\ & \leq \mathbb{E}[\phi_k(x_{k+1}) | \mathcal{F}_k] + \mathbb{E}[\frac{1}{\mu_k} \|\nabla h(x_k) - v_h(x_k)\|_2^2 + \frac{\mu_k}{4} \|x_{k+1} - x_k\|_2^2 | \mathcal{F}_k] \\ & \leq \delta + f(x_k) - \frac{1}{2(L_g + \mu_k)} \|\nabla f(x_k)\|_2^2 + \frac{\sigma_h^2}{\mu_k} + \frac{\mu_k}{4} \mathbb{E}[\|x_{k+1} - x_k\|_2^2 | \mathcal{F}_k], \end{aligned}$$

where for the first inequality we used convexity of  $h$  and for the second inequality we used Young's inequality. This finishes the proof of Proposition 1.  $\square$

Next, let us prove Theorem 1.

*Proof of Theorem 1.* Summing up the inequality of Proposition 1 over indices  $k = 1, \dots, M$  and taking the expectation, we have

$$\sum_{k=1}^M \frac{1}{2(L_g + \mu_k)} \mathbb{E}[\|\nabla f(x_k)\|_2^2] \leq M\delta + \sum_{k=1}^M \frac{\sigma_h^2}{\mu_k} + \mathbb{E}[f(x_1) - f(x_{M+1})].$$

Since  $\mu_k = O(L_g) \wedge (\mu_k = \Omega(L_g) \vee \sigma_h = 0)$  and  $f(x_1) - f(x_{M+1}) \leq f(x_1) - f_*$ ,

$$\sum_{k=1}^M \mathbb{E}[\|\nabla f(x_k)\|_2^2] \leq O(L_g M \delta + M \sigma_h^2 + L_g (f(x_1) - f_*)).$$

Noting that

$$\mathbb{E}[\|\nabla f(x_R)\|_2^2 | \mathcal{F}_M] = \frac{1}{M} \sum_{k=1}^M \|\nabla f(x_k)\|_2^2,$$

we can conclude the proof of Theorem as follows,

$$\begin{aligned}\mathbb{E}[\|\nabla f(x_R)\|_2^2] &= \mathbb{E}[\mathbb{E}[\|\nabla f(x_R)\|_2^2 | \mathcal{F}_M]] = \frac{1}{M} \sum_{k=1}^M \mathbb{E}[\|\nabla f(x_k)\|_2^2] \\ &\leq O\left(L_g \delta + \sigma_h^2 + \frac{L_g(f(x_1) - f_*)}{M}\right).\end{aligned}$$

□

Below is the proof of Proposition 2.

*Proof of Proposition 2.* It follows that

$$\begin{aligned}\mathbb{E}[\|\nabla f(x_{k+1})\|_2^2 | \mathcal{F}_k] &= \mathbb{E}[\|\nabla \phi_k(x_{k+1}) - (\nabla h(x_k) - v_h(x_k)) + \nabla h(x_k) - \nabla h(x_{k+1}) - \mu_k(x_{k+1} - x_k)\|_2^2 | \mathcal{F}_k] \\ &\leq 4\mathbb{E}[\|\nabla \phi_k(x_{k+1})\|_2^2 + \|\nabla h(x_k) - v_h(x_k)\|_2^2 + \|\nabla h(x_k) - \nabla h(x_{k+1})\|_2^2 + \mu_k^2 \|x_{k+1} - x_k\|_2^2 | \mathcal{F}_k] \\ &\leq 4\sigma_h^2 + 4\mathbb{E}[\|\nabla \phi_k(x_{k+1})\|_2^2 + (\mu_k^2 + L_h^2) \|x_{k+1} - x_k\|_2^2 | \mathcal{F}_k],\end{aligned}$$

where for the first inequality we used  $\|\sum_{j=1}^d \alpha_j\|_2^2 \leq d \sum_{j=1}^d \|\alpha_j\|_2^2$  and for the second inequality we used Lipschitz smoothness of  $h$ . Since  $\phi_k$  is  $(L_g + \mu_k)$ -smooth,

$$\frac{1}{2(L_g + \mu_k)} \mathbb{E}[\|\nabla \phi_k(x_{k+1})\|_2^2 | \mathcal{F}_k] \leq \mathbb{E}[\phi_k(x_{k+1}) - \phi_k^* | \mathcal{F}_k] \leq \delta.$$

Thus, we conclude

$$\mathbb{E}[\|\nabla f(x_{k+1})\|_2^2 | \mathcal{F}_k] \leq 4\sigma_h^2 + 8(L_g + \mu_k)\delta + 4(\mu_k^2 + L_h^2)\mathbb{E}[\|x_{k+1} - x_k\|_2^2 | \mathcal{F}_k].$$

□

By combining Proposition 1 and 2, we prove Proposition 3.

*Proof of Proposition 3.* Noting that  $\mu_k = O(L_h) \wedge \mu_k = \Omega(L_h)$ , we have

$$\begin{aligned}\mathbb{E}[\|\nabla f(x_{k+1})\|_2^2 | \mathcal{F}_k] &\leq O((L_g + L_h)\delta + \sigma_h^2 + L_h^2 \mathbb{E}[\|x_{k+1} - x_k\|_2^2 | \mathcal{F}_k]) \\ &\leq O((L_g + L_h)\delta + \sigma_h^2 + L_h \mathbb{E}[f(x_k) - f(x_{k+1}) | \mathcal{F}_k]),\end{aligned}$$

where for the first and second inequality we used Proposition 1 and 2, respectively.

□

We give the proof of Theorem 2.

*Proof of Theorem 2.* Using Proposition 3 and  $L_h = O(L_g)$ , it follows that

$$\mathbb{E}[\|\nabla f(x_{k+1})\|_2^2 | \mathcal{F}_k] \leq O(L_g \delta + \sigma_h^2 + L_h \mathbb{E}[f(x_k) - f(x_{k+1}) | \mathcal{F}_k]).$$

This inequality resemble Proposition 1 up to the term  $\mathbb{E}[\|x_{k+1} - x_k\|_2^2 | \mathcal{F}_k]$ , so that we can show the theorem in the same manner as Theorem 1.

□

## B The derivation of diagonal hessian approximation

To run AdaSPD with a diagonal hessian approximation for training BMs, we give  $\text{diag}(\nabla_{\theta}^2 h(\Theta))$ , where  $h$  is the concave part of the log-likelihood of BMs. We only consider a parameter  $W_{ij}$  connecting a visible unit  $v^i$  and a hidden unit  $h^j$  because for the other parameters it can be shown in the same manner.

$$\begin{aligned}
 \nabla_{W_{ij}}^2 h(\Theta) &= \nabla_{W_{ij}}^2 \log \sum_{\mathbf{h}} \exp(-E(\mathbf{v}, \mathbf{h}; \Theta)) \\
 &= \nabla_{W_{ij}} \left( \frac{\sum_{\mathbf{h}} \exp(-E(\mathbf{v}, \mathbf{h}; \Theta)) v^i h^j}{\sum_{\mathbf{h}} \exp(-E(\mathbf{v}, \mathbf{h}; \Theta))} \right) \\
 &= \frac{\sum_{\mathbf{h}} \exp(-E(\mathbf{v}, \mathbf{h}; \Theta)) (v^i h^j)^2}{\sum_{\mathbf{h}} \exp(-E(\mathbf{v}, \mathbf{h}; \Theta))} - \left( \frac{\sum_{\mathbf{h}} \exp(-E(\mathbf{v}, \mathbf{h}; \Theta)) v^i h^j}{\sum_{\mathbf{h}} \exp(-E(\mathbf{v}, \mathbf{h}; \Theta))} \right)^2 \\
 &= \frac{\sum_{\mathbf{h}} \exp(-E(\mathbf{v}, \mathbf{h}; \Theta)) v^i h^j}{\sum_{\mathbf{h}} \exp(-E(\mathbf{v}, \mathbf{h}; \Theta))} - \left( \frac{\sum_{\mathbf{h}} \exp(-E(\mathbf{v}, \mathbf{h}; \Theta)) v^i h^j}{\sum_{\mathbf{h}} \exp(-E(\mathbf{v}, \mathbf{h}; \Theta))} \right)^2 \\
 &= \nabla_{W_{ij}} \log \sum_{\mathbf{h}} \exp(-E(\mathbf{v}, \mathbf{h}; \Theta)) - \left( \nabla_{W_{ij}} \log \sum_{\mathbf{h}} \exp(-E(\mathbf{v}, \mathbf{h}; \Theta)) \right)^2 \\
 &= \nabla_{W_{ij}} h(\Theta) - (\nabla_{W_{ij}} h(\Theta))^2,
 \end{aligned}$$

where we used  $(v^i h^j)^2 = v^i h^j$  derived from the fact that  $v^i$  and  $h^j$  are binary units  $\{0, 1\}$ .

### C Parameter settings for training RBMs and DBMs

In our experiments, we optimized  $L_2$ -penalized log-likelihoods of RBMs and DBMs. Here, we give all parameter settings used for AdaSPD. The damping parameter  $\lambda$  was fixed to  $10^{-4}$ . The scales of metrics were set to  $\mu = 10^{-4}$  for diagonal hessian approximation and  $\mu \in \{10^{-5}, 10^{-3}, 10^{-1}\}$  for scalar matrix. The number of underlying solver iterations  $T$  and the suffix averaging parameter  $\alpha$  were set as follows:  $T = \lceil N/b \rceil, \alpha T = \lceil T/2 \rceil$ , where  $N$  is the number of data points and  $b$  is a mini-batch size. The other parameters are listed in Table 1 for binarized MNIST dataset and Table 2 for CalTech101 Silhouettes.

Table 1: Parameter settings for binarized MNIST

| Model                | Minibatch-size $b$ | PCD-k | Mean-field iter. | $L_2$ -penalty     | $\eta$    |
|----------------------|--------------------|-------|------------------|--------------------|-----------|
| RBM-15               | 32                 | 1     | -                | 0                  | $10^{-1}$ |
| RBM-25               | 32                 | 3     | -                | 0                  | $10^{-1}$ |
| RBM-500              | 128                | 10    | -                | $5 \times 10^{-4}$ | $10^{-1}$ |
| DBM-500-500-1000     | 128                | 10    | 10               | $3 \times 10^{-4}$ | $10^{-2}$ |
| DBM-500-500-500-1000 | 128                | 10    | 10               | $5 \times 10^{-4}$ | $10^{-2}$ |

Table 2: Parameter settings for CalTech101 Silhouettes

| Model   | Minibatch-size $b$ | PCD-k | Mean-field iter. | $L_2$ -penalty | $\eta$    |
|---------|--------------------|-------|------------------|----------------|-----------|
| RBM-15  | 32                 | 1     | -                | 0              | $10^{-2}$ |
| RBM-25  | 32                 | 3     | -                | 0              | $10^{-2}$ |
| RBM-500 | 64                 | 10    | -                | $10^{-3}$      | $10^{-2}$ |
